# Supplementary material for: Workplace Factors, Burnout Signs, and Clinical Mental Health Symptoms among Mental Health Workers in Lombardy and Quebec during the First Wave of COVID-19
Source: MDPI journal article supplement (doi:10.3390/ijerph19073806), 2022-03-23
Supplement: s1 [file s1]

**Table S1.** Self-reported narratives: agreement between coders (Cohen's Kappa) and recurrency of themes among the two samples.

|                                                                         | Lombardy |       | Quebec |       |
|-------------------------------------------------------------------------|----------|-------|--------|-------|
|                                                                         | K        | %     | K      | %     |
| <b>OS - Organizational support</b>                                      |          |       |        |       |
| Perceived confusion in procedures                                       | .82      | 5.9%  | 0.77   | 8.9%  |
| Suppression of holidays and work permits                                | -        | 0.0%  | 0.68   | 4.0%  |
| Perception of lack of "moral" support and authoritarian style           | .79      | 4.3%  | 0.77   | 10.9% |
| Lack of safety support regarding COVID 19                               | .86      | 5.4%  | 0.85   | 6.4%  |
| Lack of technical support                                               | .91      | 8.6%  | 0.72   | 6.9%  |
| Lack of personnel                                                       | .96      | 6.5%  | 0.81   | 11.9% |
| <b>JD - Job design</b>                                                  |          |       |        |       |
| Change in role, tasks, and procedure                                    | .85      | 21.5% | 0.64   | 21.3% |
| Adjustment to rapid changes                                             | .92      | 6.5%  | 0.72   | 8.9%  |
| Increased workload                                                      | .81      | 6.5%  | 0.70   | 16.8% |
| Increased workload due to covid related tasks                           | .93      | 3.8%  | 0.77   | 4.5%  |
| Reduced workload and tasks                                              | .62      | 4.8%  | 0.59   | 1.0%  |
| <b>ED - Emotional distress</b>                                          |          |       |        |       |
| Fear of catching covid at work                                          | .95      | 2.8%  | 0.65   | 2.2%  |
| Fear of transmitting covid to users                                     | .99      | 1.4%  | 0.72   | 2.2%  |
| Sense of generalized uncertainty towards future                         | .88      | 3.3%  | 0.7    | 1.6%  |
| Uncertainty of redeployment                                             | -        | 0.0%  | 0.47   | 3.3%  |
| Exhaustion and fatigue                                                  | .92      | 12.4% | 0.85   | 11.9% |
| <b>DQ - Perception of decrease in the quality of mental health care</b> |          |       |        |       |
| General perception of decrease in quality of care                       | .62      | 3.3%  | 0.46   | 2.7%  |
| Interruption / suspension of interventions / activities                 | .91      | 22.0% | 0.69   | 3.5%  |
| Perceived worsening and frailty of users and patients                   | .98      | 7.5%  | 0.74   | 8.4%  |
| Less implication of family members                                      | .97      | 0.9%  | 0.88   | 1.1%  |
| Worsening of the clinical alliance due to remote contacts               | .94      | 17.5% | 0.68   | 3.3%  |
| Worsening of the clinical alliance due to mask wearing                  | .99      | 0.5%  | 0.75   | 1.1%  |
| Users' barriers hinder remote contacts                                  | .87      | 13.4% | 0.72   | 2.0%  |
| <b>TG - Teamwork and group climate</b>                                  |          |       |        |       |
| Conflicts in group teamwork                                             | .90      | 2.4%  | 0.75   | 3.3%  |
| Lack of support from colleagues, loneliness                             | .84      | 3.8%  | 0.79   | 2.7%  |
| Reduced quality of teamwork due to remote contacts                      | .82      | 3.3%  | 0.51   | 2.5%  |
| <b>WL - Work-Life balance</b>                                           |          |       |        |       |
| Difficulties in working with children at home                           | .99      | 1.4%  | 0.69   | 0.5%  |
| Other work-life balance issues                                          | .86      | 4.7%  | 0.55   | 2.2%  |
| <b>RS - Restrictions and safety rules</b>                               |          |       |        |       |
| Users' frustration towards covid restrictions                           | .79      | 1.4%  | n-a.   | 0.0%  |
| Colleagues' difficulty towards covid restrictions                       | .85      | 0.9%  | 0.66   | 1.1%  |
| Masks and safety procedure discomfort                                   | .92      | 1.1%  | 0.89   | 6.4%  |
| Making users' respecting safety norms                                   | .97      | 4.3%  | 0.75   | 5.9%  |
